# Supplementary material for: Combining asymmetric PCR-based enzymatic amplification with silicon photonic microring resonators for the detection of lncRNAs from low input human RNA samples
Source: Royal Society of Chemistry journal article supplement (doi:10.1039/c7an02045g), 2018-01-01
Supplement: c7an02045g1.pdf [file c7an02045g1.pdf]

## Supplementary Information

# Combining asymmetric PCR-based enzymatic amplification with silicon photonic microring resonators for the detection of lncRNAs from low input human RNA samples

*Maria C. Cardenosa-Rubio,<sup>a</sup> Richard M. Graybill,<sup>a,b</sup> and Ryan C. Bailey<sup>a\*</sup>*

<sup>a</sup>Department of Chemistry, University of Michigan, 930 N. University Ave., Ann Arbor, MI, 48104

<sup>b</sup>Department of Chemistry, University of Illinois at Urbana Champaign, 600 S. Matthews Ave., Urbana, IL, 61801

Corresponding author: e-mail: ryancb@umich.edu (R.C. Bailey)

### Table of Contents:

|                                                                                        |    |
|----------------------------------------------------------------------------------------|----|
| <b>Table S1.</b> Fluidic handling protocol for the ring hybridization steps .....      | S2 |
| <b>Figure S1.</b> Secondary structure prediction of PCR amplicons .....                | S3 |
| <b>Figure S2.</b> Hybridization comparison of $\beta$ -actin secondary structure ..... | S4 |
| <b>Figure S3.</b> Agarose gels of PCR products .....                                   | S5 |
| <b>Figure S4.</b> Schematic and image of microring chip spotting array .....           | S5 |
| <b>Figure S5.</b> Raw data used to calculate lncRNA expression profiles .....          | S6 |
| <b>Table S2.</b> Microring and qRT-PCR C(t) values .....                               | S7 |

**Table S1.** Fluidic handling protocol for the ring hybridization steps.

| <b>Step</b>             | <b>Flow Rate (<math>\mu\text{L}/\text{min}</math>)</b> | <b>Duration (min)</b> |
|-------------------------|--------------------------------------------------------|-----------------------|
| Hybridization buffer    | 20                                                     | 5                     |
| RT-PCR product cycle 30 | 20                                                     | 13                    |
| Hybridization buffer    | 20                                                     | 2                     |
| RT-PCR product cycle 32 | 20                                                     | 13                    |
| Hybridization buffer    | 20                                                     | 2                     |
| RT-PCR product cycle 34 | 20                                                     | 13                    |
| Hybridization buffer    | 20                                                     | 2                     |
| RT-PCR product cycle 36 | 20                                                     | 13                    |
| Hybridization buffer    | 20                                                     | 2                     |
| RT-PCR product cycle 38 | 20                                                     | 13                    |
| Hybridization buffer    | 20                                                     | 2                     |
| RT-PCR product cycle 40 | 20                                                     | 13                    |
| Hybridization buffer    | 20                                                     | 5                     |

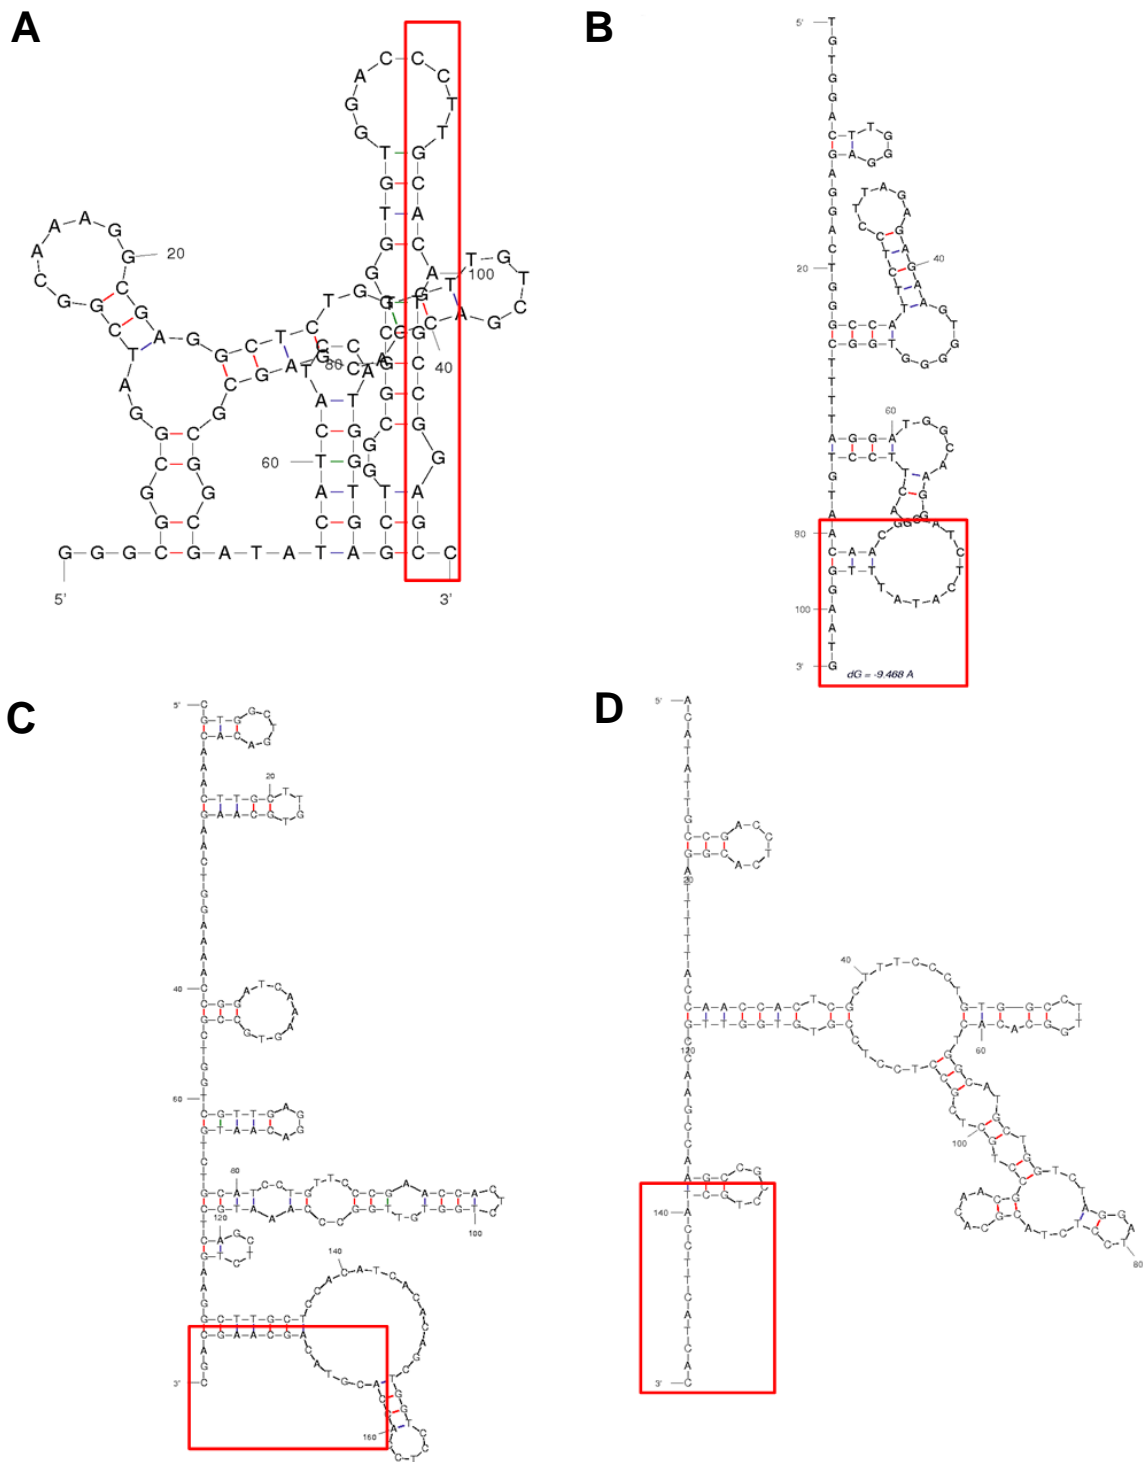

**Figure S1.** Secondary structures of amplified regions obtained using the DinaMelt Web Server. The region that binds to the capture probe is highlighted with a red square. (A)  $\beta$ -actin amplified region will not bind to complimentary capture probes due to excessive secondary structure. (B)  $\beta$ -actin amplified region after primer redesign that enables surface binding. (C) KIAA0495 amplified region with minimal secondary structure. (D) MALAT1 amplified region with minimal secondary structure.

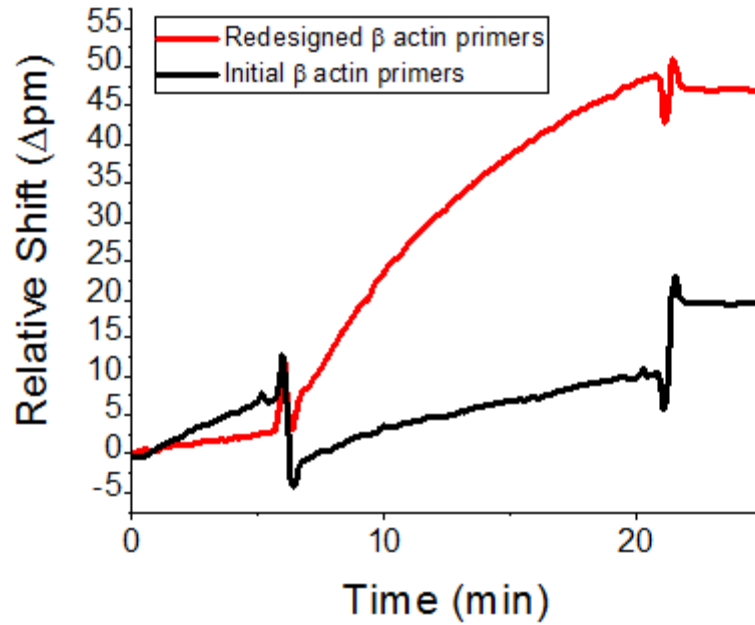

**Figure S2.** Comparison of  $\beta$ -actin PCR product binding with and without optimized primer design. The red trace shows improved binding when using the optimized primer sets (predicted structure shown in in Supplementary Figure 1B). The black trace shows data obtained using the PCR amplicon with a high degree of secondary structure (Supplementary Figure 1A). At  $t = 5$  minutes, the solution was changed from hybridization buffer to the amplicon-containing solution, then returned to hybridization buffer at  $t = 20$  minutes. The larger positive resonance shift confirmed improved amplification with new primer design.

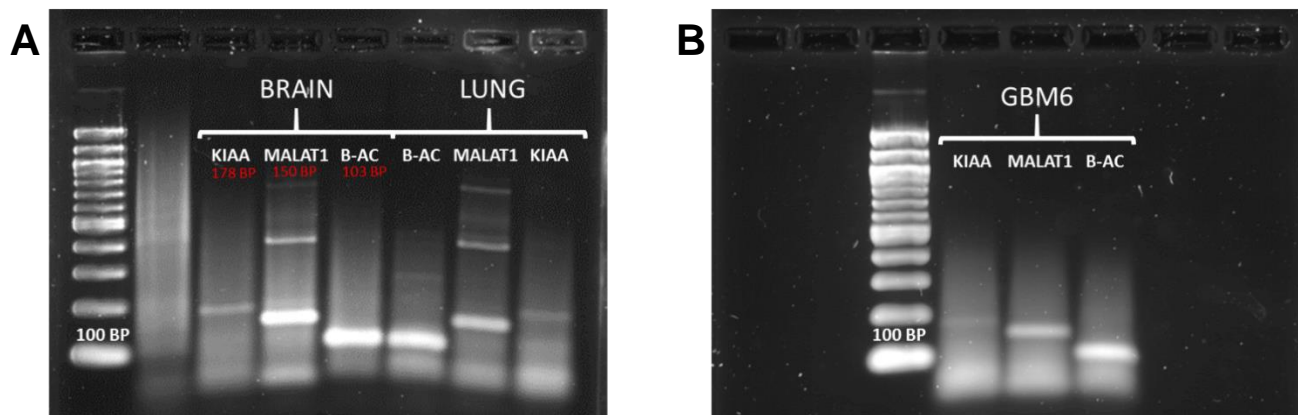

**Figure S3.** Agarose gel electrophoresis (2% agarose; SYBR Gold Stain) used to prove specific PCR amplification of lncRNAs and  $\beta$ -actin in (A) commercial brain and lung RNA samples; and (B) RNA isolated from GBM6 cells.

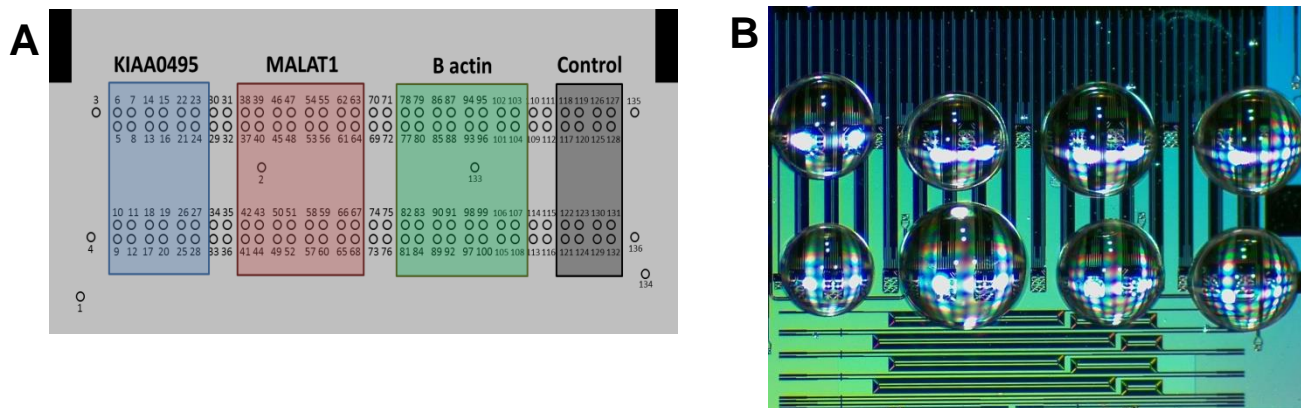

**Figure S4.** (A) Spotting layout of microring sensor chip showing the spatial distribution of capture probes. (B) Image of microring functionalization corresponding to the layout in Figure S4A.

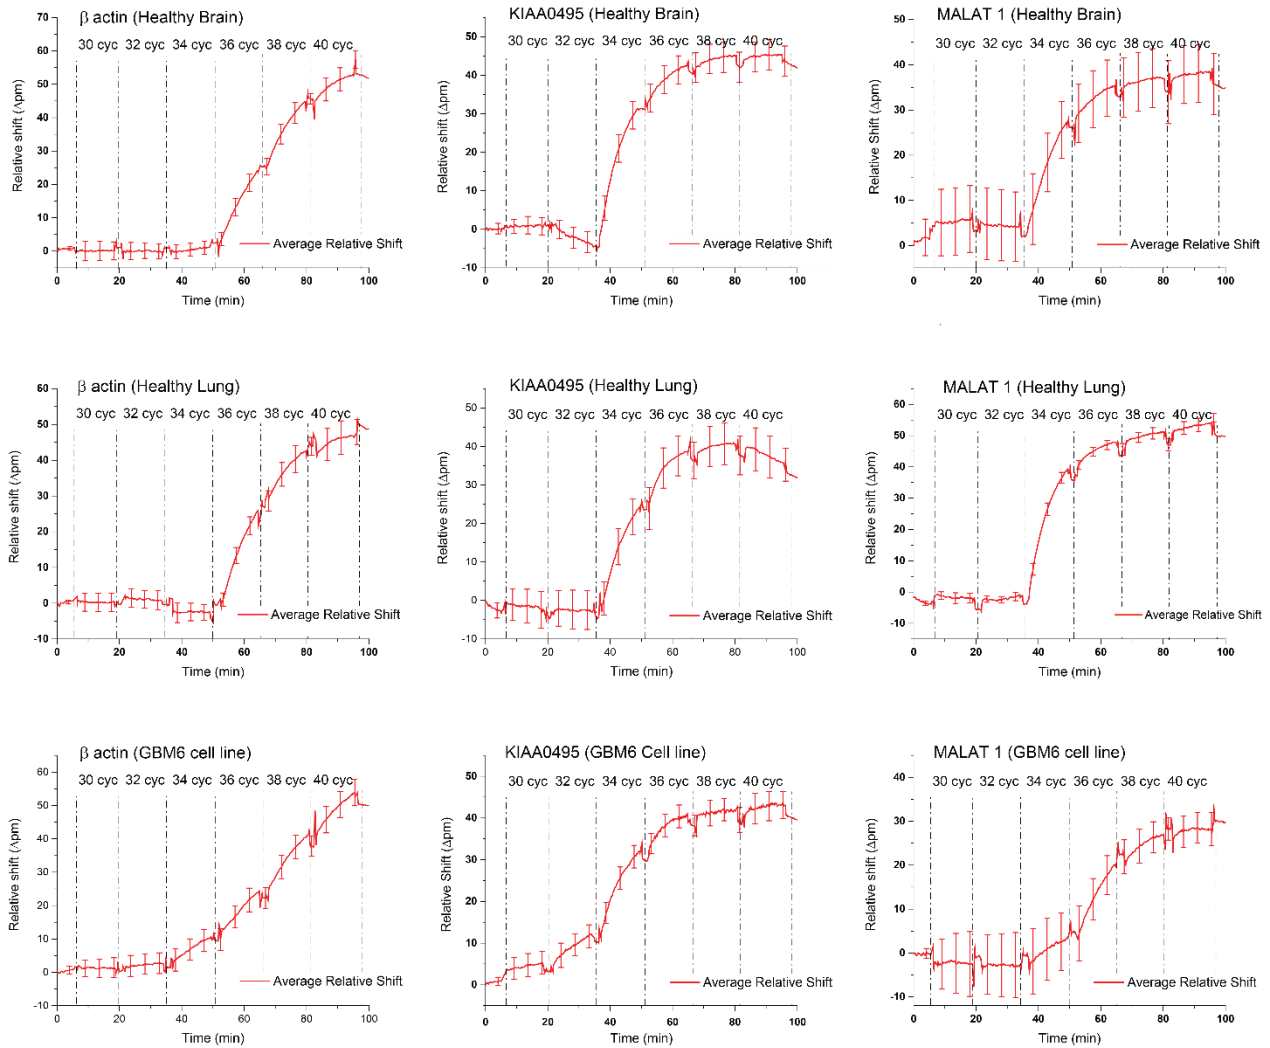

**Figure S5.** Microring traces used to calculate amplification plots in Figure 4. The trace signal represents the average of at least 8 replicate microrings simultaneously measure on the same chip minus the off control signal from non-specific functionalized rings. Error bars represent  $\pm$  s.d. for  $n=8-16$  replicate measurements on the same microring sensor array. University of Strathclyde, UK

**Table S2.** Calculated qRT-PCR and microring C(t) values from healthy brain, healthy lung and GBM6 RNA samples. The RNA input for qRT-PCR experiments was 40 ng, and the qRT-PCR experiments were completed in triplicate.

| RNA   | Target   | qRT-PCR C(t) | Rings C(t) | qPCR Fold change (log <sub>2</sub> )** | Rings Fold change (log <sub>2</sub> )** |
|-------|----------|--------------|------------|----------------------------------------|-----------------------------------------|
| Brain | B actin  | 17.40        | 35.65      | -                                      | -                                       |
|       | KIAA0495 | 21.16        | 33.09      | -                                      | -                                       |
|       | MALAT1   | 17.77        | 33.04      | -                                      | -                                       |
| Lung  | B actin  | 17.40*       | 35.65*     | 0                                      | 0                                       |
|       | KIAA0495 | 21.57*       | 33.44*     | - 0.41                                 | - 0.64                                  |
|       | MALAT1   | 16.38*       | 33.68*     | - 0.61                                 | - 0.35                                  |
| GBM 6 | B actin  | 17.40*       | 35.65*     | 0                                      | 0                                       |
|       | KIAA0495 | 21.36*       | 32.72*     | 0.20                                   | 0.32                                    |
|       | MALAT1   | 19.05*       | 34.90*     | -2.68                                  | -1.81                                   |

\* Corrected signal with internal control

\*\* Healthy brain as reference; Fold Change =  $C(t)_{ref} - C(t)_{sample}$
